# Supplementary material
Source: PubMed Central journal article supplement (PMC6280649)
Supplement: EMBR-19-e45995-s001.pdf [file EMBR-19-e45995-s001.pdf]

# Table of Contents

**Appendix Figure S1.**

**C/EBP $\beta$  does not induce Foxp3 expression in the absence of TGF- $\beta$**

**Page 2**

**Appendix Figure S2.**

**C/EBP $\beta$  deficiency does not result in any differences of Foxp3 expression**

**Page 3**

**A**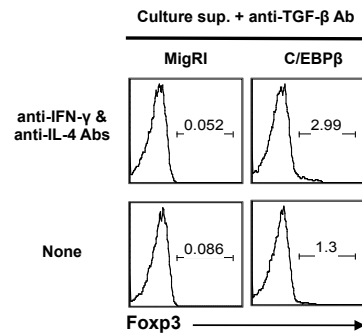**B**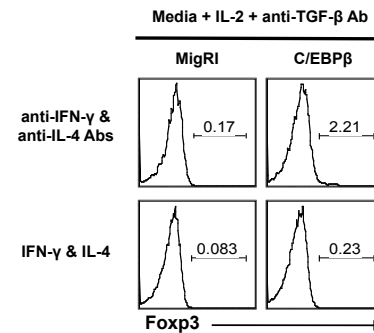

**Appendix Figure S1. C/EBPβ does not induce Foxp3 expression in the absence of TGF-β.** (A) Flow cytometry of intracellular staining for Foxp3 in CD4<sup>+</sup> naïve T cells transduced with control retrovirus (MigRI) or retrovirus encoding C/EBPβ and stimulated with anti-CD3 and anti-CD28 for 2 d in the presence of anti-TGF-β Ab and culture supernatant with (top) or without (bottom) anti-IFN-γ and IL-4 Abs. Histograms are gated for GFP<sup>+</sup> cells. Numbers indicate percent Foxp3<sup>+</sup> cells in GFP<sup>+</sup> gate. Data are representative of two independent experiments with consistent results. (B) Flow cytometry of intracellular staining for Foxp3 in CD4<sup>+</sup> naïve T cells transduced with control retrovirus (MigRI) or retrovirus encoding C/EBPβ and stimulated with anti-CD3 and anti-CD28 for 2 d in the presence of anti-TGF-β Ab and IL-2 with anti-IFN-γ and anti-IL-4 Abs (top) or IFN-γ and IL-4 (bottom). Histograms are gated for GFP<sup>+</sup> cells. Numbers indicate percent Foxp3<sup>+</sup> cells in GFP<sup>+</sup> gate. Data are representative of two independent experiments with consistent results.

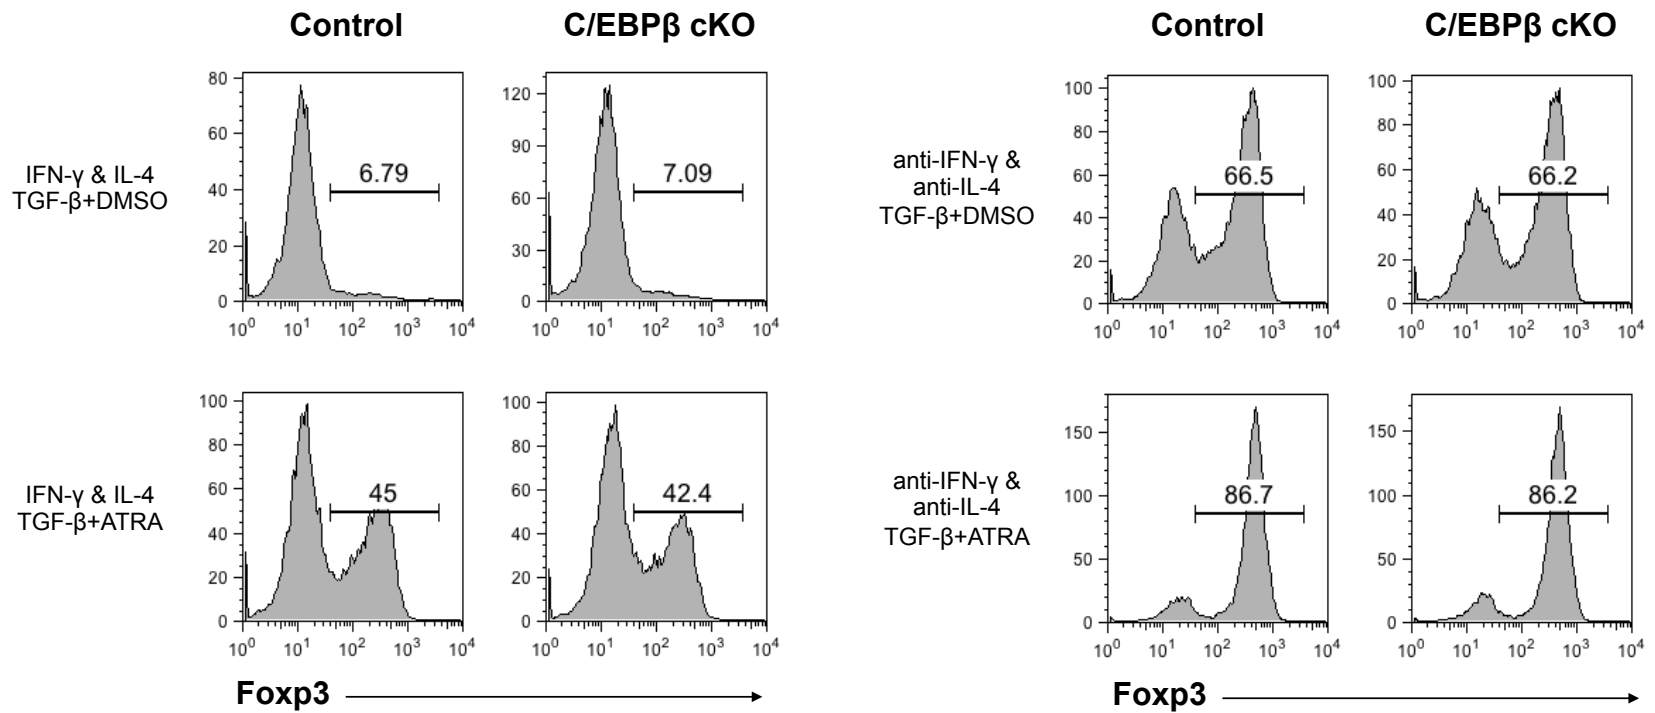

**Appendix Figure S2. C/EBP $\beta$  deficiency does not result in any differences of Foxp3 expression**
