# Supplementary material
Source: PubMed Central journal article supplement (PMC6280649)
Supplement: EMBR-19-e45995-s002.pdf [file EMBR-19-e45995-s002.pdf]

## Expanded View Figures

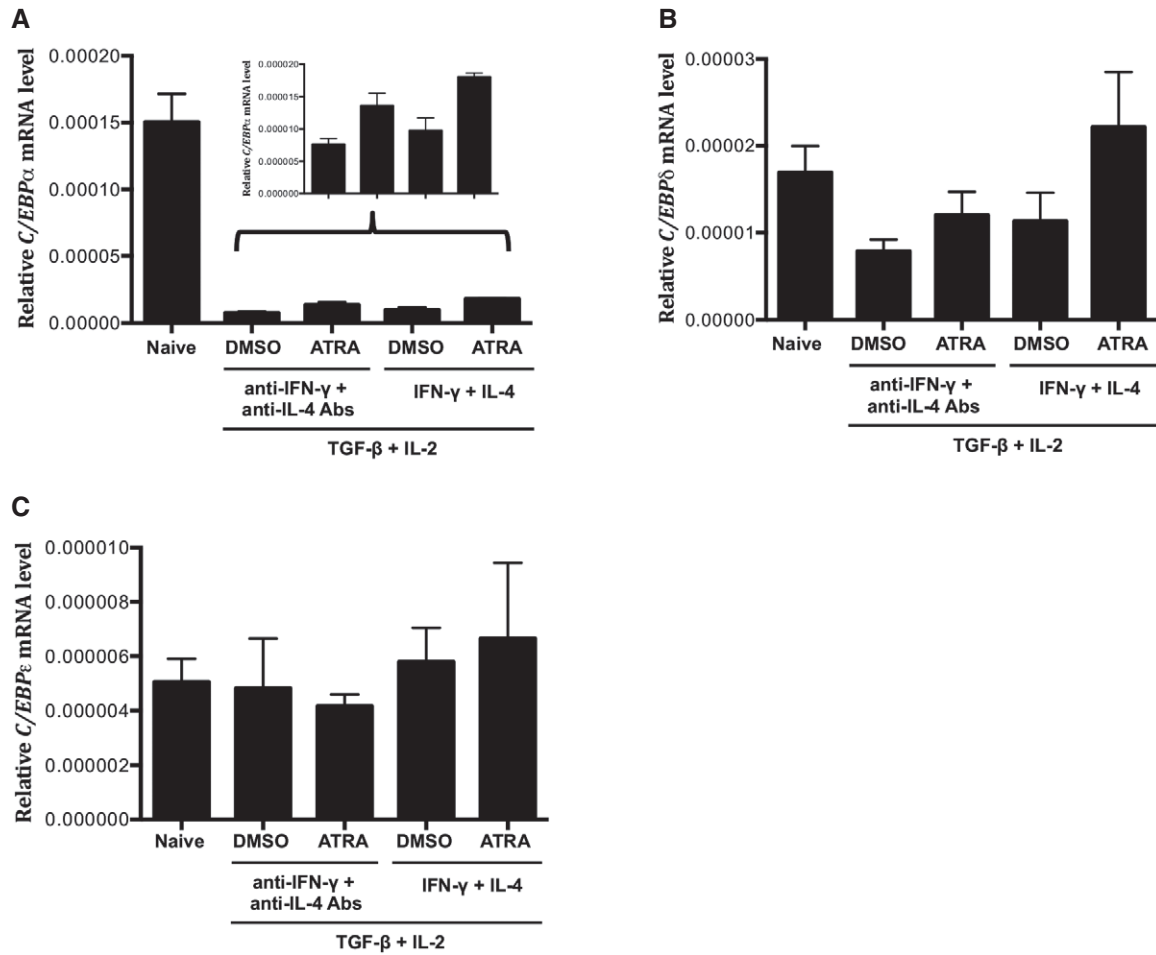

**Figure EV1.** C/EBP $\alpha$  and C/EBP $\delta$  are also upregulated by RA.

A–C Real-time qRT–PCR analysis of (A) C/EBP $\alpha$ , (B) C/EBP $\delta$ , (C) C/EBP $\epsilon$  mRNA in CD4<sup>+</sup> naive T cells inactivated (naive) or cultured for 24 h under conditions as indicated. Data are representative of two independent experiments with consistent results and normalized with  $\beta$ -actin (mean and s.e.m. of quadruplicates).

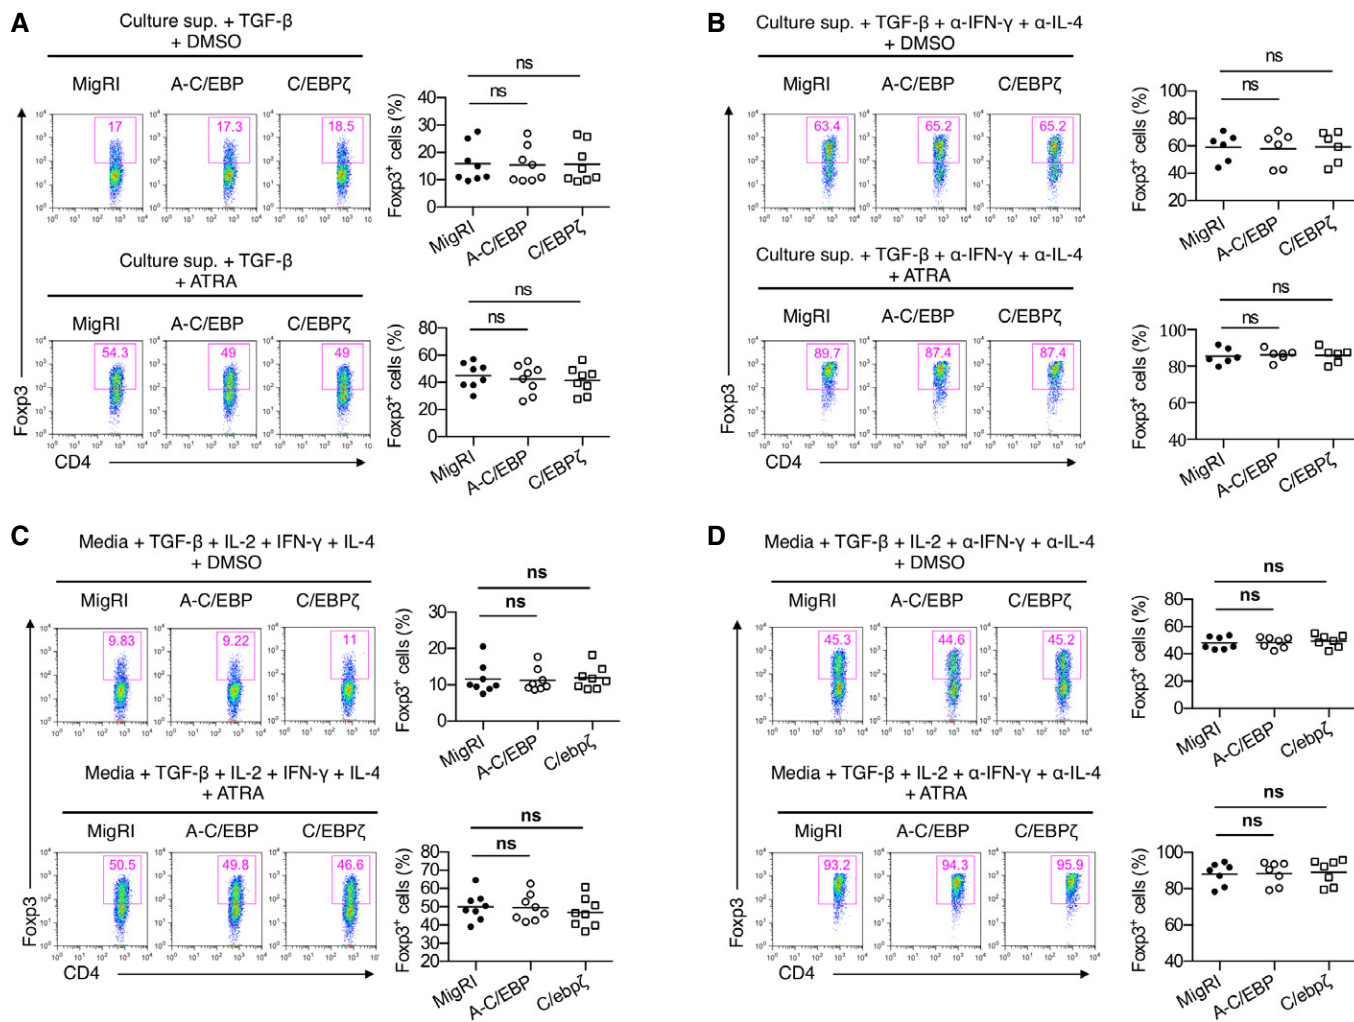

Figure EV2. GFP-negative cell fraction of Fig 1C-F.

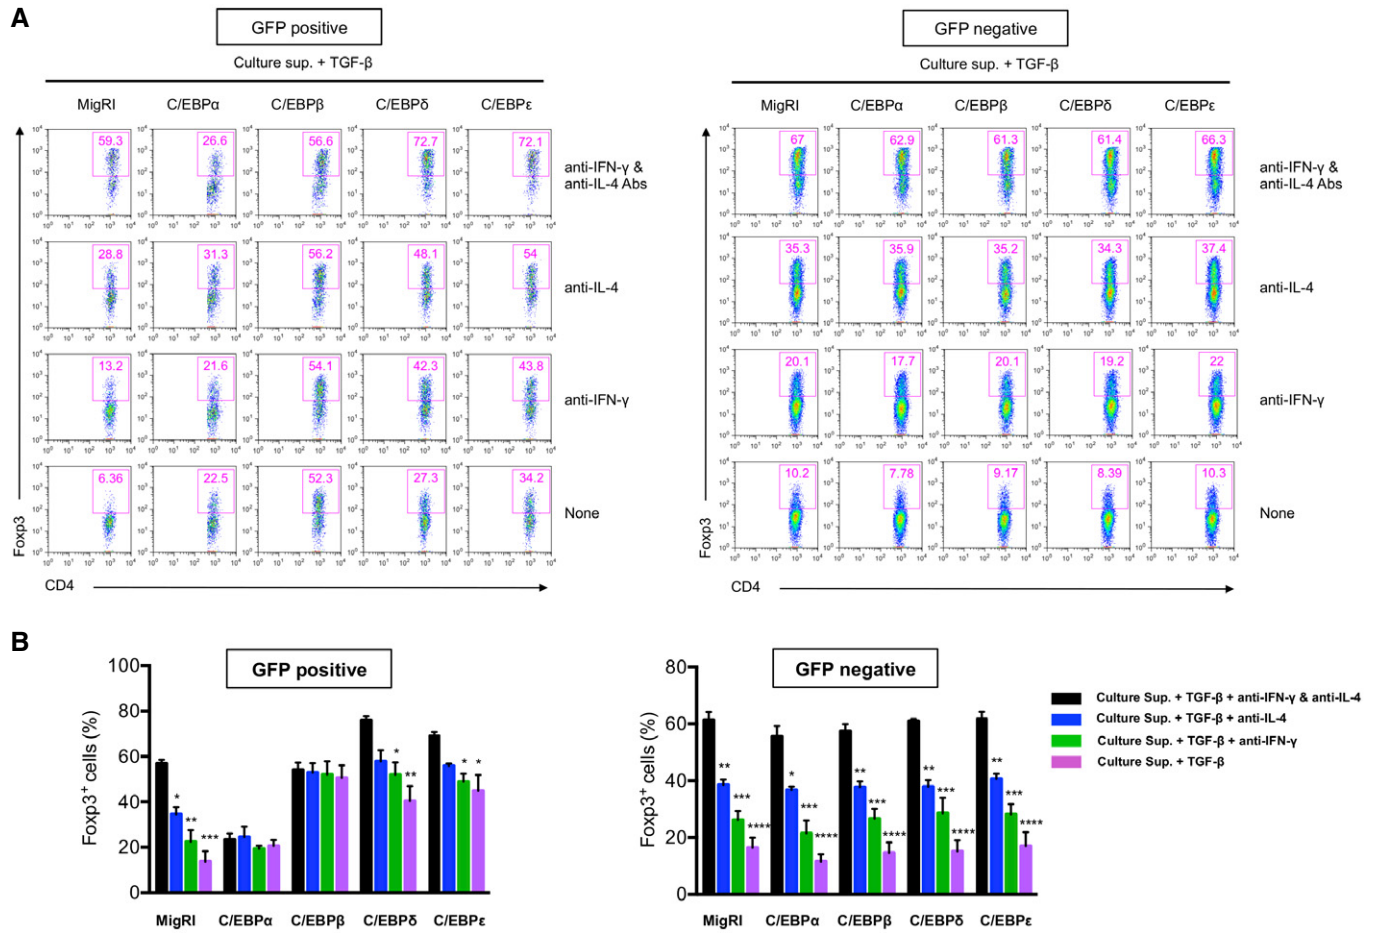

**Figure EV3. C/EBP $\alpha$ ,  $\delta$ , and  $\epsilon$  also counteract the effect of inhibitory cytokines on Foxp3 induction.**

A Flow cytometry of intracellular staining for Foxp3 in CD4<sup>+</sup> naive T cells transduced with control retrovirus (MigRI) or retrovirus encoding C/EBP $\alpha$ , C/EBP $\beta$ , C/EBP $\delta$ , or C/EBP $\epsilon$  and stimulated with anti-CD3 and anti-CD28 for 2 days in the presence of TGF- $\beta$  and culture supernatant with anti-IFN- $\gamma$  and anti-IL-4 Abs, anti-IL-4 Ab, anti-IFN- $\gamma$  Ab, or none. Histograms are gated for GFP<sup>+</sup> (left panel) and GFP<sup>-</sup> (right panel) cells. Numbers indicate percent Foxp3<sup>+</sup>.

B Frequency of Foxp3<sup>+</sup> cells from independent three experiments (mean and s.e.m.). Statistical analysis was performed using one-way ANOVA (\* $P$  < 0.05, \*\* $P$  < 0.01, \*\*\* $P$  < 0.001, \*\*\*\* $P$  < 0.0001).

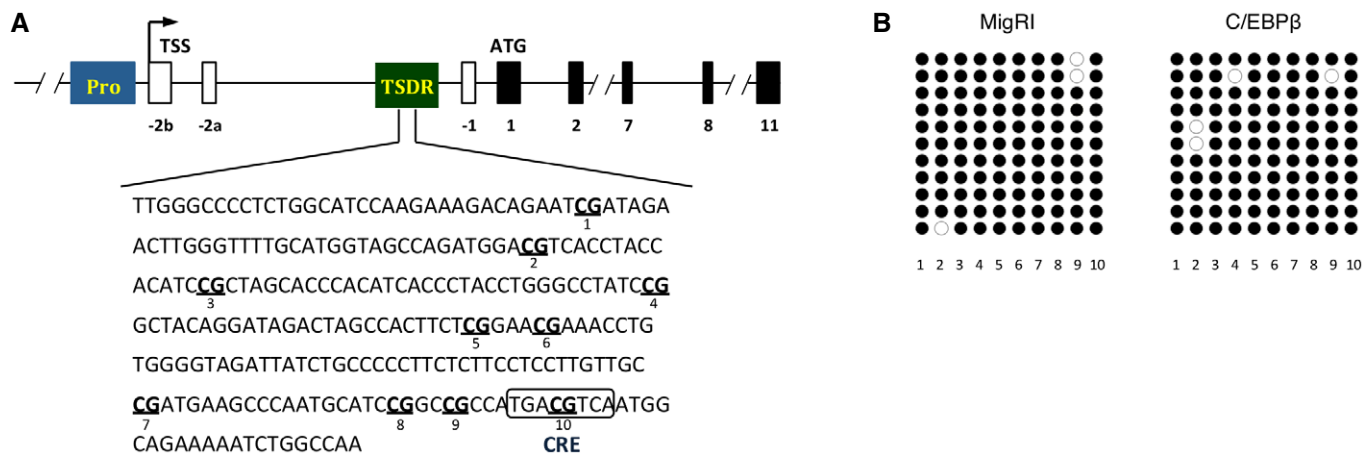

**Figure EV4. C/EBPβ does not alter the methylation status of the TSDR.**

A The *Foxp3* gene. Exon–intron structure and the TSDR are depicted (top). The position of 10 CpG motifs and CRE sequence within the TSDR is shown (bottom).  
 B Bisulfite sequencing of FACS-sorted GFP<sup>+</sup> cells from CD4<sup>+</sup> naïve T cells transduced with control retrovirus (MigRI) or retrovirus encoding C/EBPβ and cultured for 2 days in the presence of TGF-β and culture supernatant.

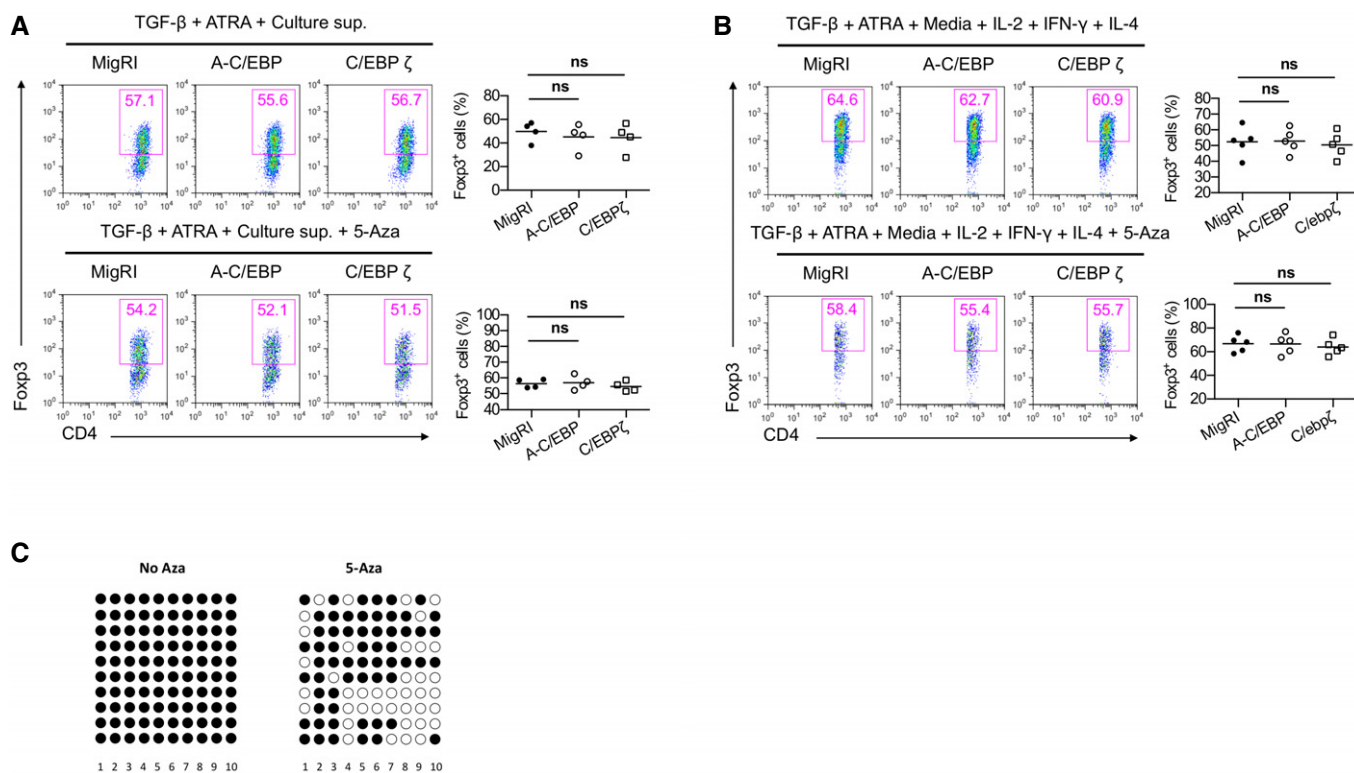

**Figure EV5. GFP-negative cell fraction of Fig 4C and D, and bisulfite sequencing after 5-aza treatment.**

A, B GFP-negative cell fraction of Fig 4C and D.  
 C Bisulfite sequencing of TSDR of FACS-sorted GFP<sup>+</sup> cells from CD4<sup>+</sup> naïve T cells transduced with control retrovirus (MigRI) and cultured for 2 days in the presence of TGF-β, ATRA, 5-aza, and culture supernatant.
